# Supplementary material for: No temporal trends in the prevalence of atypical scrapie in British sheep, 2002–2006
Source: PubMed Central journal article supplement (PMC2397389; doi:10.1186/1746-6148-4-13), 2008-04-02
Supplement: 1746-6148-4-13-S1.pdf [file 1746-6148-4-13-S1.pdf]

**Additional file 1. Table 1. Number of animals tested and number of samples positive for atypical scrapie by *PrP* genotype and year for abattoir surveys in GB, 2002-2006.**

| <i>PrP</i><br>genotype | 2002     |        | 2003     |                     | 2004     |                     | 2005     |                     | 2006     |                     |
|------------------------|----------|--------|----------|---------------------|----------|---------------------|----------|---------------------|----------|---------------------|
|                        | positive | tested | positive | tested <sup>†</sup> | positive | tested <sup>‡</sup> | positive | tested <sup>‡</sup> | positive | tested <sup>‡</sup> |
| ARR/ARR                | 3        | 3039   | 7        | 12535               | 3        | 2741                | 1        | 2876                | 1        | 11805               |
| ARR/AHQ                | 4        | 1497   | 10       | 5965                | 3        | 780                 | 8        | 834                 | 11       | 3284                |
| ARR/ARH                | 0        | 230    | 0        | 1082                | 0        | 652                 | 0        | 676                 | 0        | 2874                |
| ARR/ARQ                | 2        | 4939   | 7        | 20063               | 1        | 2773                | 3        | 2913                | 6        | 12078               |
| AHQ/AHQ                | 4        | 267    | 5        | 938                 | 1        | 169                 | 0        | 181                 | 3        | 728                 |
| AHQ/ARH                | 0        | 57     | 0        | 207                 | 0        | 98                  | 0        | 101                 | 1        | 448                 |
| AHQ/ARQ                | 3        | 1423   | 11       | 5488                | 2        | 534                 | 1        | 569                 | 8        | 2298                |
| ARH/ARH                | 0        | 47     | 0        | 327                 | 0        | 459                 | 0        | 469                 | 0        | 2112                |
| ARH/ARQ                | 0        | 179    | 0        | 813                 | 0        | 315                 | 1        | 324                 | 0        | 1441                |
| ARQ/ARQ                | 2        | 2237   | 4        | 9192                | 2        | 1152                | 2        | 1207                | 5        | 5112                |
| ARR/VRQ                | 0        | 870    | 0        | 3449                | 0        | 426                 | 0        | 446                 | 0        | 1874                |
| AHQ/VRQ                | 0        | 265    | 0        | 1005                | 0        | 103                 | 0        | 108                 | 0        | 454                 |
| ARH/VRQ                | 0        | 33     | 0        | 154                 | 0        | 88                  | 0        | 89                  | 0        | 406                 |
| ARQ/VRQ                | 0        | 658    | 1        | 2588                | 0        | 259                 | 0        | 270                 | 0        | 1156                |
| VRQ/VRQ                | 0        | 57     | 0        | 332                 | 0        | 41                  | 0        | 42                  | 0        | 189                 |
| total                  | 18       | 15798  | 45       | 64138               | 12       | 10590               | 16       | 11105               | 35       | 46259               |

<sup>†</sup> in 2003 negative samples were *PrP* genotyped between January 2003 and March 2003; negative samples tested during the remainder of the year were assumed to have the same genotype distribution.

<sup>‡</sup> in 2004-2006 negative samples were not *PrP* genotyped; the genotype distribution for negative samples in each year was estimated from the population structure of the national flock based on data from the NSP.

**Table 2. Number of animals tested and number of samples positive for atypical scrapie by *PrP* genotype and year for fallen stock surveys in GB, 2003-2006.**

| <i>PrP</i><br>genotype | 2003     |                     | 2004     |                     | 2005     |                     | 2006     |                     |
|------------------------|----------|---------------------|----------|---------------------|----------|---------------------|----------|---------------------|
|                        | positive | tested <sup>†</sup> | positive | tested <sup>†</sup> | positive | tested <sup>†</sup> | positive | tested <sup>†</sup> |
| ARR/ARR                | 0        | 758                 | 1        | 1102                | 0        | 2340                | 0        | 6587                |
| ARR/AHQ                | 0        | 271                 | 1        | 377                 | 1        | 757                 | 2        | 1962                |
| ARR/ARH                | 1        | 153                 | 0        | 200                 | 0        | 357                 | 0        | 836                 |
| ARR/ARQ                | 0        | 760                 | 0        | 998                 | 0        | 1934                | 1        | 4681                |
| AHQ/AHQ                | 1        | 56                  | 1        | 70                  | 2        | 127                 | 3        | 289                 |
| AHQ/ARH                | 0        | 17                  | 0        | 17                  | 0        | 27                  | 1        | 50                  |
| AHQ/ARQ                | 1        | 176                 | 0        | 213                 | 1        | 381                 | 2        | 857                 |
| ARH/ARH                | 0        | 73                  | 0        | 69                  | 0        | 99                  | 0        | 180                 |
| ARH/ARQ                | 0        | 57                  | 0        | 55                  | 0        | 87                  | 0        | 163                 |
| ARQ/ARQ                | 0        | 297                 | 1        | 333                 | 1        | 564                 | 2        | 1196                |
| ARR/VRQ                | 0        | 111                 | 0        | 136                 | 0        | 237                 | 0        | 506                 |
| AHQ/VRQ                | 0        | 28                  | 0        | 31                  | 0        | 49                  | 0        | 96                  |
| ARH/VRQ                | 0        | 13                  | 0        | 12                  | 0        | 17                  | 0        | 28                  |
| ARQ/VRQ                | 0        | 63                  | 0        | 68                  | 0        | 104                 | 0        | 203                 |
| VRQ/VRQ                | 0        | 7                   | 0        | 8                   | 0        | 11                  | 0        | 18                  |
| total                  | 3        | 2840                | 4        | 3689                | 5        | 7091                | 11       | 17652               |

<sup>†</sup> negative samples were not *PrP* genotyped; the genotype distribution for negative samples in each year was estimated from the population structure of the national flock based on data from the NSP.
